# Supplementary material
Source: publisher figshare collection journal article supplement (https://frontiersin.figshare.com/ndownloader/files/12713609)
Supplement: Supplementary file [file 12713609]

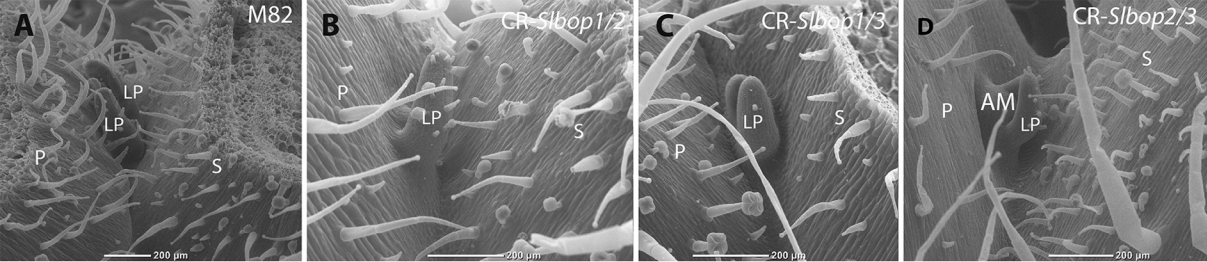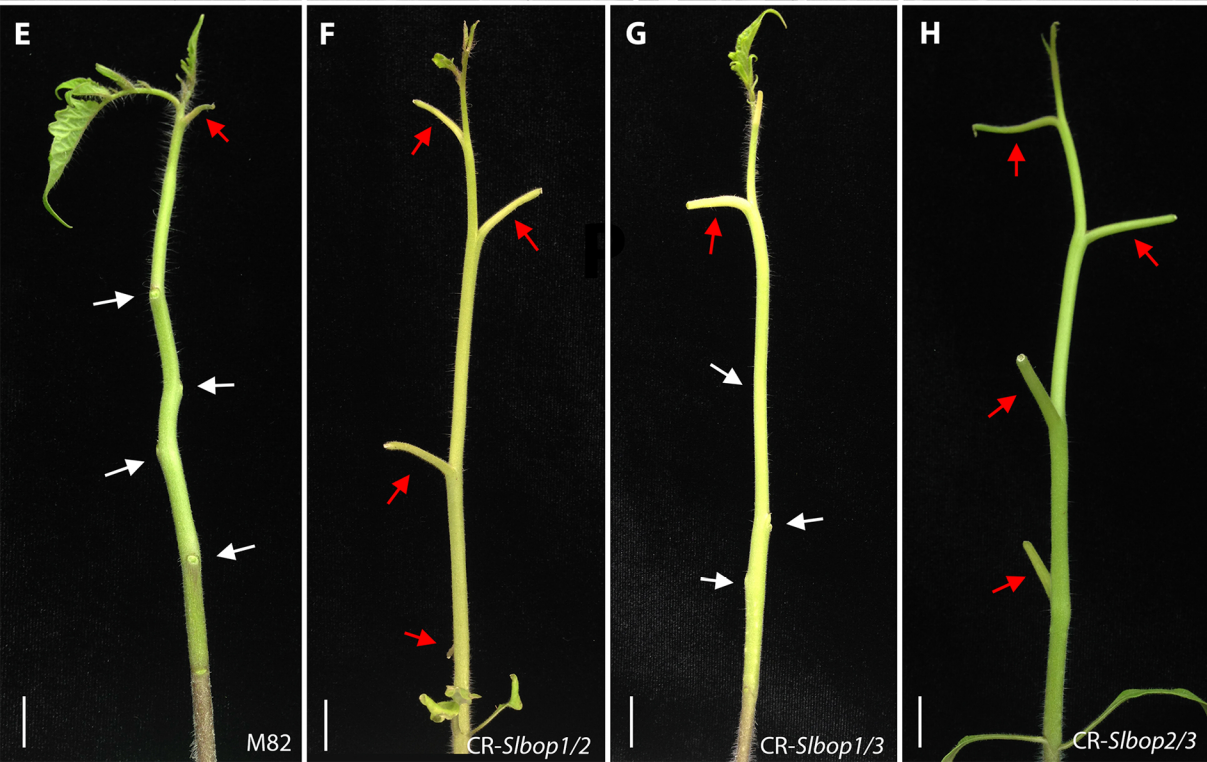

Supplementary Figure 5: Leaf axil patterning in tomato *Slbop* double mutant plants. A - D. SEM analysis of the first leaf axil of four-week old wild type (M82) (A) and *CR-slbop* double mutant tomato plants: *CR-slbop1/2* (B), *CR-slbop1/3* (C) and *CR-slbop1/3* (D). E - H. Leaf abscission was induced in the first four leaves of seven-week old wild type (E), *CR-slbop1/2* (F) *CR-slbop1/3* (G) and *CR-slbop2/3* (H). P- petiole, S - stem, LP - leaf primordium, white arrows - abscised petiole, red arrow - non-abscised petiole. Bars (A-D) = 200  $\mu$ M, (F-I) = 1 cm.
